# Supplementary material for: Alteration of the microRNA network during the progression of Alzheimer's disease
Source: PubMed Central journal article supplement (PMC3799583; doi:10.1002/emmm.201201974), 2013-09-09
Supplement: emmm0005-1613-SD2.pdf [file emmm0005-1613-SD2.pdf]

## **SUPPLEMENTARY INFORMATION:**

### **TABLE OF CONTENT**

#### **1/ Supplementary Figure legends and Supplementary Figures**

Supplementary Figure 1. Quality assessment of the total RNA and distribution of the nCounter raw data

Supplementary Figure 2. Comparison of the raw data from hippocampus samples showing different RIN values

Supplementary Figure 3. Skewness and overdispersion of the nCounter data

Supplementary Figure 4. Multiple-group comparison of the prefrontal cortex data obtained with the nCounter system

Supplementary Figure 5. Comparison of deregulated miRNAs in diverse brain areas of LOAD patients

Supplementary Figure 6. Co-targets of miR-132-3p and the FOX transcription factors

#### **2/ Supplementary Tables**

Supplementary Table 1. Clinical diagnosis of cohort 1 (hippocampus samples)

Supplementary Table 2. Clinical data of sample cases in the cohort 2 (prefrontal cortex samples)

Supplementary Table 3. Clinical diagnosis of sample cases in the cohort 3 (temporal gyrus samples)

Supplementary Table 4. MiRNAs called different by deep-sequencing and without corresponding probes in the nCounter system

Supplementary Table 5. Percentage of neurons positive for miR-132-3p in the prefrontal cortex

Supplementary Table 6. miR-132-3p predictions for Tau related targets and FOX targets by different algorithms

Supplementary Table 7. Enrichment of transcription factor binding sites in the promoter of genes down-regulated between BRI and BRVI

Supplementary Table 8. Detection of FOX motifs by HOMER (known motif approach) in the different gene sets

Supplementary Table 9. List of PCR primers used for 3'UTR cloning

## SUPPLEMENTARY FIGURE LEGENDS

### **Supplementary Figure 1. Quality assessment of the total RNA and distribution of the nCounter raw data**

#### A/ RIN density plot of hippocampus and prefrontal cortex samples

The RIN values of the 64 hippocampus samples show alteration of RNA integrity in the vast majority of samples (blue density plot). RIN values are from 2.3 (lowest quality) to 7.4 (highest quality), with median RIN=3.8. The RIN values of the 49 prefrontal cortex samples (red density plot) are high, varying from 5.6 (lowest quality) to 9.1 (highest quality). Median RIN of prefrontal cortex samples=7.6.

#### B/ Distribution of the raw counts from hippocampus samples

The raw data of the 64 hippocampus samples were log<sub>2</sub>-transformed and boxplots represent global miRNA expression for each sample grouped according to their RIN values. From left to right, samples were ranked from highest to lowest total RNA quality. The number of samples in each color group is: red= 9 samples with 6<RIN<7.4, yellow= 11 samples with 5<RIN<6, blue= 11 samples with 4<RIN<5, purple= 14 samples with 3<RIN<4 and green= 19 samples with 2<RIN<3. Samples with lowest RIN values show similar distribution to those with highest RIN values.

#### C/ Distribution of the raw counts from prefrontal cortex samples

The raw counts of the 49 prefrontal cortex samples were log<sub>2</sub>-transformed and distribution of miRNA expression for each sample is shown by boxplot. Samples were stratified based on their RIN values. From left to right, samples were from highest to lowest quality. The color code is: red= 19 samples with 8<RIN<9.1, yellow= 22 samples with 7<RIN<8 and blue= 8

samples with  $5.6 < \text{RIN} < 7$ . Distributions from these high-quality prefrontal cortex samples are similar to those found for hippocampus samples (see panel B).

### **Supplementary Figure 2. Comparison of the raw data from hippocampus samples showing different RIN values**

A/ Pairwise comparisons of highest and lowest quality hippocampus samples

The raw counts of 10 samples with lowest RIN values (X1H, X33H, X39H, X40H, X60H, X144H, X13H, X24H, X26H, X7H) were compared to those of 10 samples with highest RIN values (X32H, X8H, X67H, X70H, X29H, X2H, X15H, X28H, X56H, X30H). Horizontal red line delimitates low and high quality samples grouped according to their RIN values. Pairwise comparisons were made by using scatterplots of log<sub>2</sub>-transformed raw counts (lower panel) and Pearson's correlation between each pair of samples was determined (upper panel). Pearson's correlation coefficient between any two hippocampus samples taken from each group was from 0.81 to 0.94 (green rectangle of the upper panel).

B/ Histograms of raw counts from hippocampus samples

Raw counts of hippocampus samples were log<sub>2</sub>-transformed and histograms for each sample represent the percentage of miRNAs found in each bin of log<sub>2</sub>-transformed expression values. The absence of a bell-shaped distribution function (histograms positively skewed), in addition to the discrete counting nature of the nCounter technology, precludes a statistical testing based on a normal distribution. The null hypothesis that raw data were normally distributed was formally rejected ( $p=2.2E^{-16}$ , Shapiro-Wilk test).

### **Supplementary Figure 3. Skewness and overdispersion of the nCounter data**

A/ Histograms of raw counts from the prefrontal cortex samples

Raw counts of prefrontal cortex samples were log<sub>2</sub>-transformed and resulting histograms show positive skewness as observed for the hippocampus samples.

#### B/ Overdispersion of counts for the hippocampus samples

The miRNA counts possess characteristics of variance exceeding the mean (scatter smooth plot) and therefore show overdispersion with respect to a discrete Poisson distribution. For the theoretical Poisson distribution, the mean equals variance and dots should be scattered around the black line. As alternative to the Poisson model, a statistical model based on the negative binomial distribution was used to account for overdispersion when calling differential expression of miRNAs.

#### C/ Overdispersion of counts in the prefrontal cortex dataset

In this dataset, the variance was also higher than the mean, similar to what was observed for the hippocampus samples (panel B) and arguing for the use of a model based on the negative binomial distribution to determine which miRNAs were deregulated in LOAD prefrontal cortex.

### **Supplementary Figure 4. Multiple-group comparison of the prefrontal cortex data obtained with the nCounter system**

A/ The number of differentially expressed miRNAs between any two Braak stages found by three different methods: DESeq (see main paper), edgeR (allowing a distinct dispersion for each miRNA “tagwise”) and voom+Limma (after transformation to obtain a log<sub>2</sub> counts per million value (cpm) for each miRNA and calculated as followed:  $\text{cpm} = \log_2 \left( \frac{(\text{counts} + 0.5)}{(\text{total number of counts} + 1)} \right) * 10^6$ ). Overlaps between the different methods are also represented in the Venn diagram.

## **Supplementary Figure 5. Comparison of deregulated miRNAs in diverse brain areas of LOAD patients**

### **A/ Comparison of miRNAs deregulated in the LOAD hippocampus**

The up- and down-regulated hippocampal miRNAs reported by Cogswell et al. were compared to those found in the nCounter experiment. The old nomenclature was lifted to the miRBase V19 nomenclature. There was one up-regulated miRNA and four down-regulated miRNAs in common. Note the presence of miR-132-3p in common between the two experiments. Up-hippo= Up-regulated in the nCounter data, Up-Hippo-C: Up-regulated in Cogswell's study, Down-Hippo= Down-regulated in the nCounter data, Down-Hippo-C: Down-regulated in Cogswell's study.

### **B/ Comparison of miRNAs deregulated in the LOAD prefrontal cortex**

The up and down-regulated prefrontal cortex miRNAs reported by Cogswell et al. were compared to the nCounter experiment. The old miRNA names were lifted to the ones found in miRBase V19. There was two down-regulated miRNAs found to be in common between the two studies including miR-210 and miR-132-3p. Up-prefrontal= Up-regulated in the nCounter data, Up-Prefrontal-C= Up-regulated in Cogswell's study, Down-Prefrontal= Down-regulated in the nCounter data, Down-Prefrontal-C: Down-regulated in Cogswell's study.

### **C/ Comparison of miRNAs deregulated in the hippocampus, parietal, anterior temporal cortex and grey matter of the temporal cortex**

The up and down-regulated miRNAs found to be deregulated in the four diverse brain areas were directly extracted from the literature (see main paper for references). Data were not reanalyzed and results are shown as initially reported by the respective authors. Each brain area is represented by a rectangle and overlap between rectangles with number >0 indicates

the number of miRNAs found in common by the considered studies. Note the absence of miRNAs in common between the four studies. Parietal= red, Grey matter of temporal cortex= green, Hippocampus= purple, Anterior temporal cortex= blue.

### **Supplementary Figure 6. Co-targets of miR-132-3p and the FOX transcription factors**

A/ Binding site motifs of FOX TFs predicted as miR-132-3p targets

Binding motifs of five of the six FOXs predicted by TargetScan to be miR-132-3p targets are shown by logos. Note the highly similar motifs for the five FOXs for which information was available in the queried databases. No motif information existed for FOXN3.

B/ Overlap between targets of miR-132-3p and FOXs

The promoters of the 407 miR-132-3p targets predicted by TargetScan were analyzed by iRegulon to find enriched regulatory motifs and by the ENCODE ChIP-Seq Significance Tool to identify enriched ENCODE TFs. Both tools were in accordance, with the enrichment of motifs for the FOX TFs in 204 of 407 predicted targets (iRegulon) and the binding of FOXP2 to 202 of the 407 miR-132-3p predicted targets. The overlap between the two tools was made of 95 predicted targets. When adding 93 up-regulated transcripts (BRVI compared to BRI) found to be enriched by Gene Set Enrichment Analysis (GSEA), an overlap of 31 transcripts was found, potentially being of relevance to LOAD.

**A**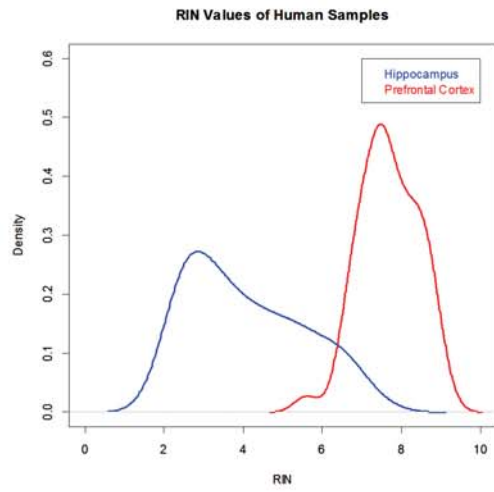**C**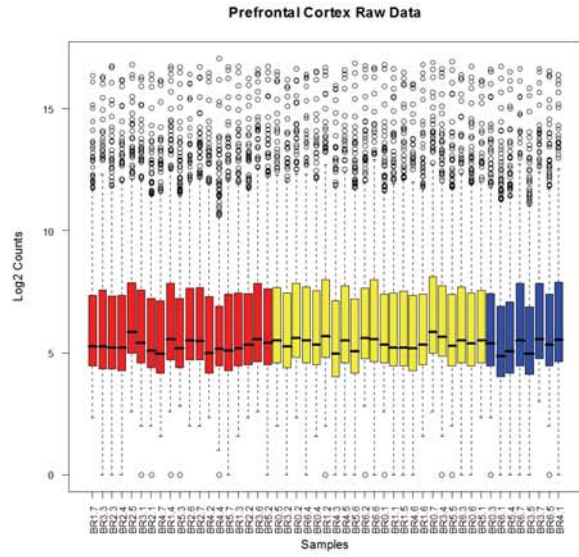**B**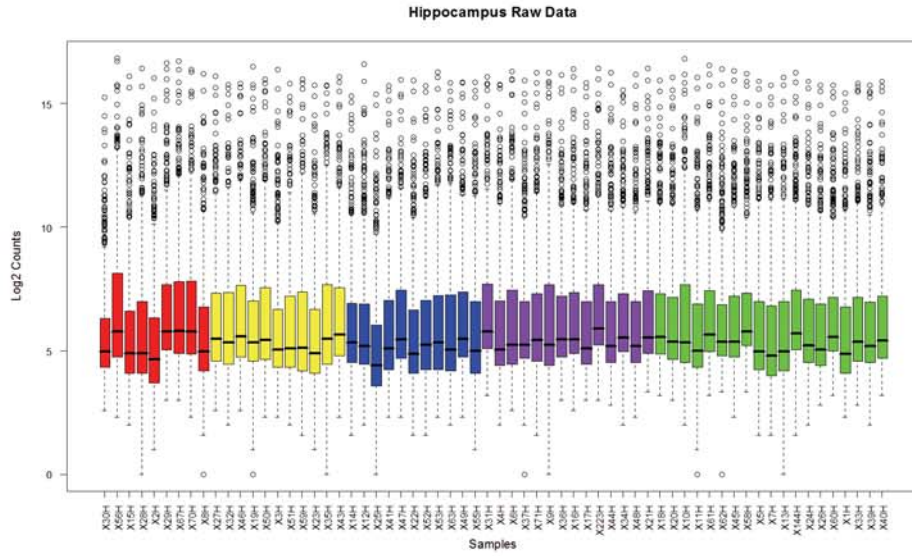

Supplementary Figure 1





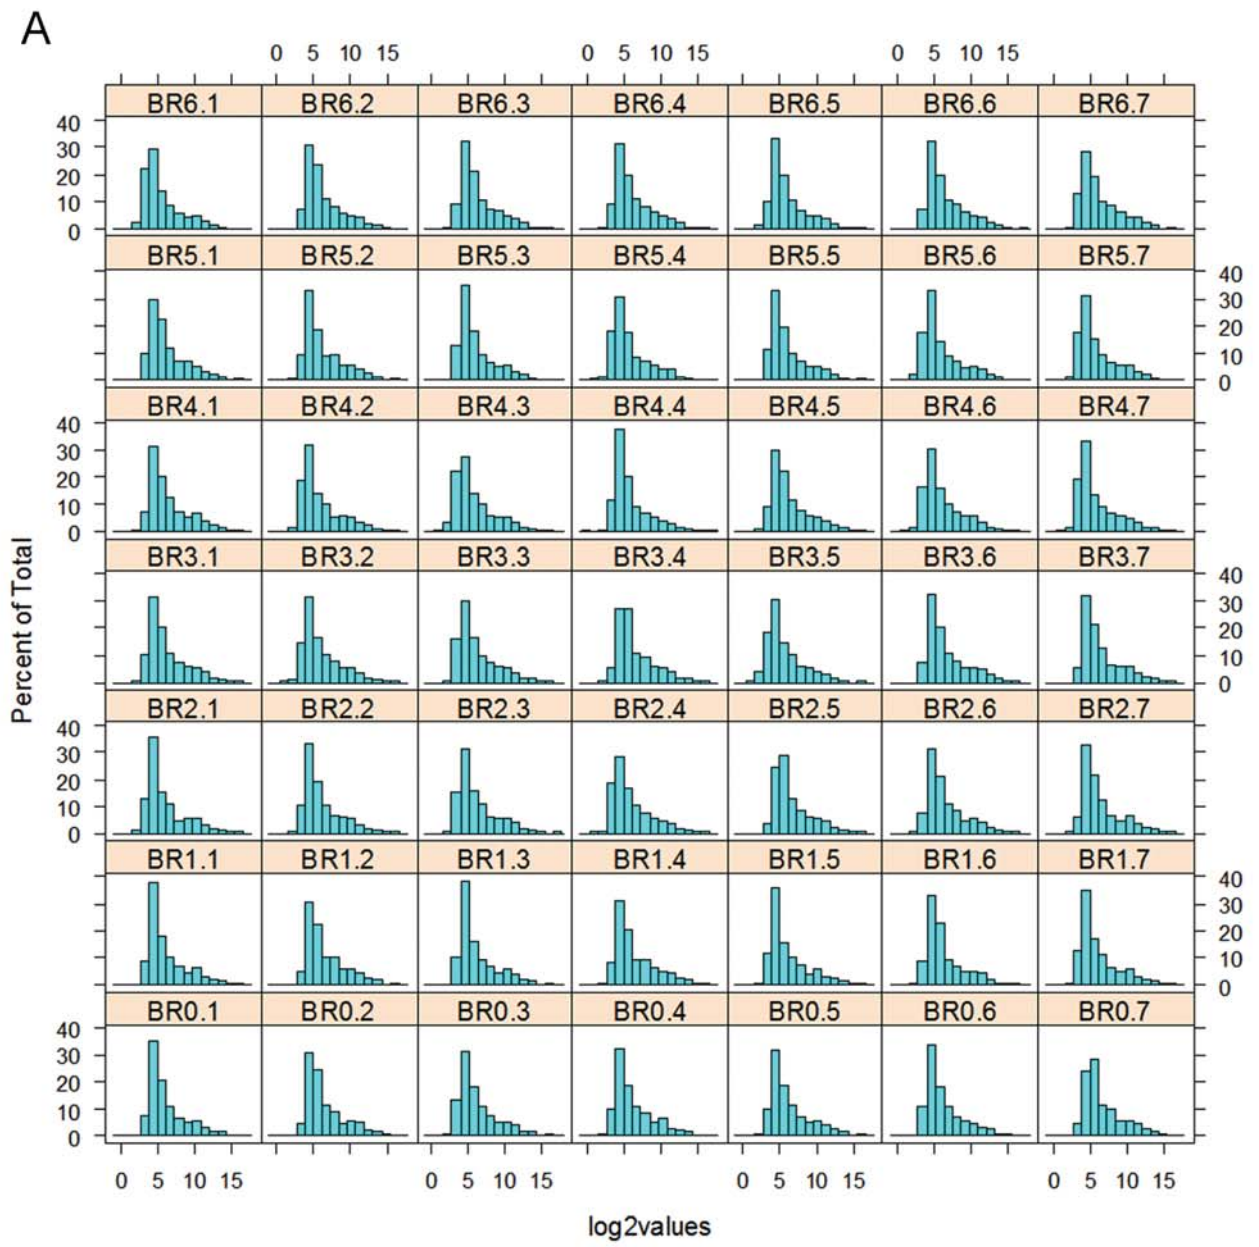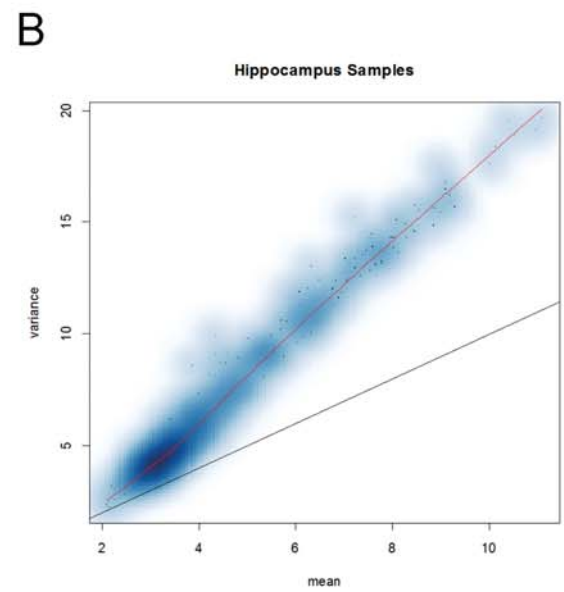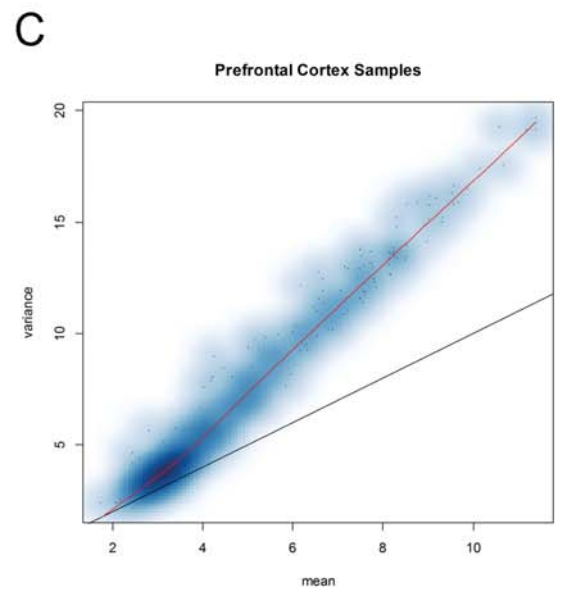

Supplementary Figure 3

# Supplementary Figure 4

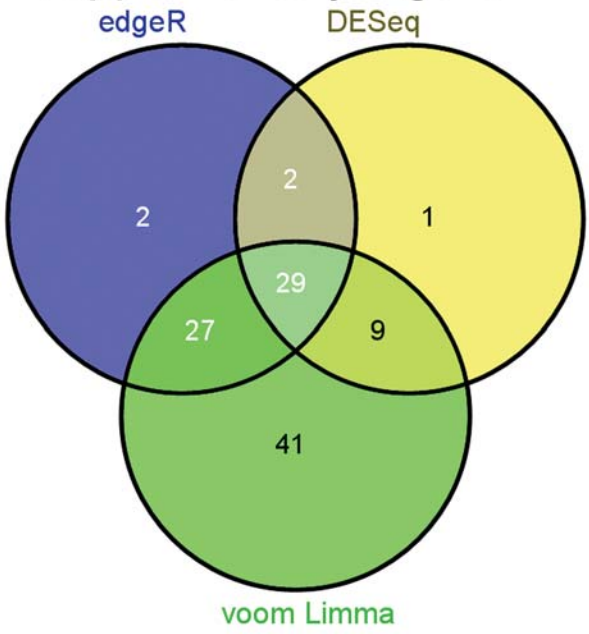

A

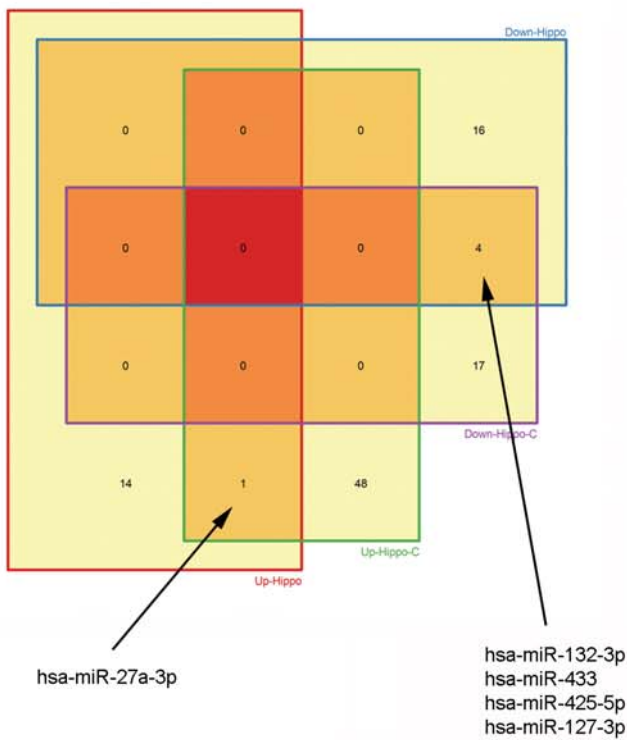

B

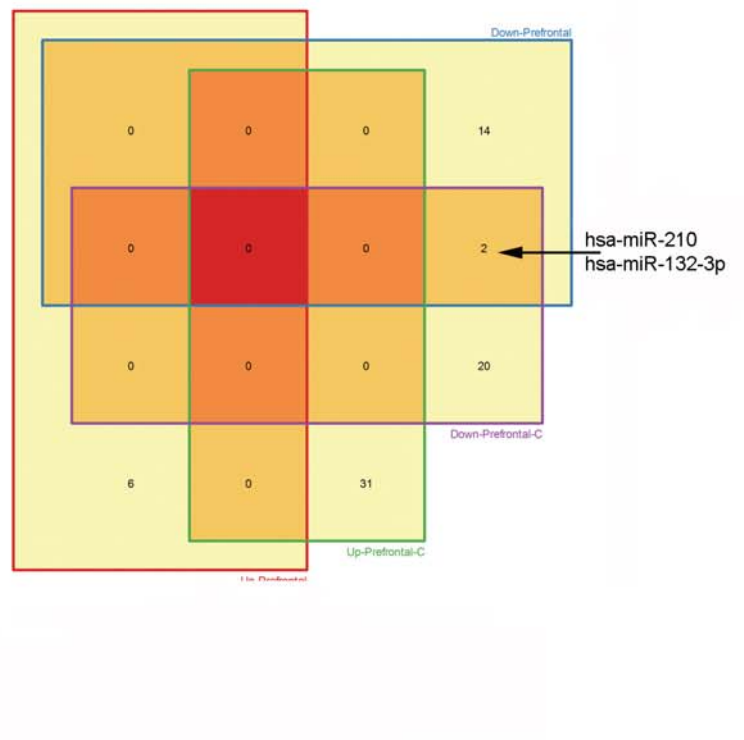

C

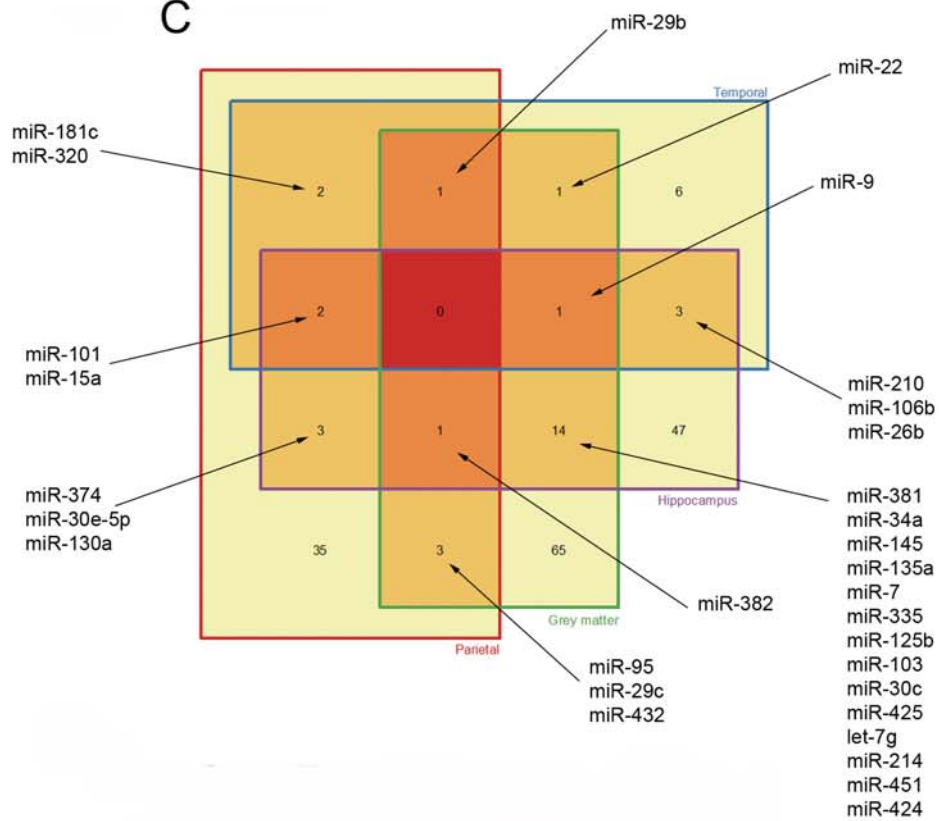

Supplementary Figure 5

A

|       |  |
|-------|--|
| FOXA1 |  |
| FOXO1 |  |
| FOXO3 |  |
| FOXP1 |  |
| FOXP2 |  |

B

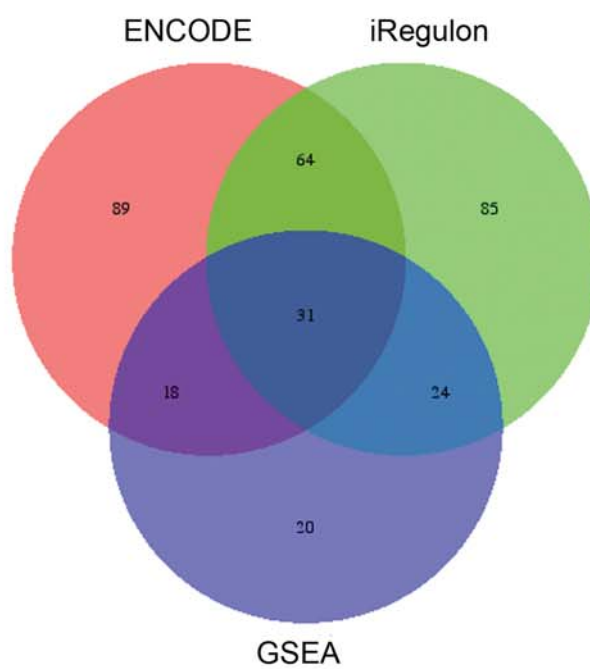

Supplementary Figure 6

Supplementary Table 1. Clinical diagnosis of cohort 1 (hippocampus samples)

| ID    | Brain region | Class   | Sex | Age | PMI   | Diagnosis 1                                         | Diagnosis 2                                                                                                             |
|-------|--------------|---------|-----|-----|-------|-----------------------------------------------------|-------------------------------------------------------------------------------------------------------------------------|
| X43H  | hippocampus  | Control | F   | 89  | 41    | Normal                                              | control case but with Hypoxic-type changes and amyloid angiopathy (AD BNE modified Braak score I-II)                    |
| X44H  | hippocampus  | Control | F   | 90  | 50    | Leukemia                                            | control brain- mild alzheimer-type changes (modified Braak stage II) and mild amyloid angiopathy                        |
| X45H  | hippocampus  | Control | M   | 66  | 52    | normal                                              | normal brain with minimal ageing changes, consistent with HP-tau stage +                                                |
| X46H  | hippocampus  | Control | M   | 54  | 30.5  | cancer                                              | Normal brain parenchyma                                                                                                 |
| X47H  | hippocampus  | Control | M   | 78  | 24    | metastatic lesions                                  | control - multiple deposits of metastatic carcinoma                                                                     |
| X48H  | hippocampus  | Control | M   | 81  | 18    | cerebral infarcts                                   | control - old cerebral infarct (Braak I)                                                                                |
| X49H  | hippocampus  | Control | M   | 78  | 30.5  | normal brain                                        | control BUT extensive amyloid angiopathy - no significant Alzheimer's pathology Braak I                                 |
| X50H  | hippocampus  | Control | F   | 92  | 17    | normal brain                                        | control brain with some tau deposition                                                                                  |
| X51H  | hippocampus  | Control | F   | 80  | 3     | cancer                                              | minimal ageing changes, consistent with HP-Tau stage I; childhood poliomyelitis                                         |
| X52H  | hippocampus  | Control | F   | 55  | 12    | Mild atrophy                                        | minimal tau pathology consistent with HP-tau stage I                                                                    |
| X53H  | hippocampus  | Control | M   | 80  | 49    | Normal brain                                        | Consistent with ageing                                                                                                  |
| X55H  | hippocampus  | Control | M   | 37  | 27    | ALCOHOLIC CIRROHSIS                                 | Normal adult brain                                                                                                      |
| X56H  | hippocampus  | Control | M   | 54  | 50    | ACUTE RESPIRATORY FAILURE                           | Normal adult brain                                                                                                      |
| X58H  | hippocampus  | Control | M   | 41  | 32    | ACUTE PANCREATITIS                                  | Normal adult brain                                                                                                      |
| X59H  | hippocampus  | Control | M   | 42  | 27    | PERITONITIS                                         | Normal adult brain                                                                                                      |
| X60H  | hippocampus  | Control | M   | 59  | 50    | Cancer                                              | NORMAL ADULT BRAIN (NO SIGNIFICANT PATHOLOGY)                                                                           |
| X61H  | hippocampus  | Control | F   | 82  | 43    | Cancer                                              | Normal adult brain                                                                                                      |
| X62H  | hippocampus  | Control | M   | 79  | 24    | SEPTICAEMIA                                         | MILD AGEING CHANGES                                                                                                     |
| X63H  | hippocampus  | Control | M   | 55  | 24    | SYRINGOMYELIA                                       | Normal adult brain                                                                                                      |
| X67H  | hippocampus  | Control | F   | 81  | 49    | CHRONIC ISCHAEMIC HEART DISEASE                     | Normal adult brain                                                                                                      |
| X70H  | hippocampus  | Control | M   | 85  | 42    | GASTROINTESTINAL HAEMORRHAGE                        | Normal adult brain                                                                                                      |
| X71H  | hippocampus  | Control | F   | 64  | 60    | CARCINOMA OF BLADDER                                | Normal adult brain                                                                                                      |
| X144H | hippocampus  | Control | F   | 92  | 22.5  | Normal                                              | Amyloid angiopathy. Suitable as control for MND and tau pathology in AD (Braak I-II) but some A-beta vascular pathology |
| X10H  | hippocampus  | LOAD    | M   | 55  | 18.25 | ALZHEIMER'S DISEASE: DEFINITE                       | None                                                                                                                    |
| X11H  | hippocampus  | LOAD    | F   | 88  | 6     | ALZHEIMER'S DISEASE                                 | None                                                                                                                    |
| X12H  | hippocampus  | LOAD    | F   | 96  | 19    | Alzheimer's disease Braak V                         | severe amyloid angiopathy                                                                                               |
| X13H  | hippocampus  | LOAD    | F   | 79  | 19.3  | ALZHEIMER'S DISEASE                                 | None                                                                                                                    |
| X14H  | hippocampus  | LOAD    | M   | 76  | 22    | Alzheimer's disease Braak VI                        | severe amyloid angiopathy, ischaemic lesions in cortex                                                                  |
| X15H  | hippocampus  | LOAD    | F   | 90  | 17    | ALZHEIMER'S DISEASE                                 | None                                                                                                                    |
| X16H  | hippocampus  | LOAD    | F   | 90  | 16    | ALZHEIMER'S DISEASE: DEFINITE                       | AMYLOID ANGIOPATHY                                                                                                      |
| X17H  | hippocampus  | LOAD    | F   | 64  | 9.5   | ALZHEIMER'S DISEASE: DEFINITE                       | None                                                                                                                    |
| X18H  | hippocampus  | LOAD    | M   | 71  | 5.25  | Alzheimer's disease Braak V/VI                      | None                                                                                                                    |
| X19H  | hippocampus  | LOAD    | F   | 84  | <24   | Alzheimer's disease Braak 5                         | None                                                                                                                    |
| X1H   | hippocampus  | LOAD    | M   | 70  | 12    | ALZHEIMER'S DISEASE                                 | None                                                                                                                    |
| X20H  | hippocampus  | LOAD    | F   | 81  | 24    | Alzheimer's disease Braak VI?                       | None                                                                                                                    |
| X21H  | hippocampus  | LOAD    | F   | 79  | 24    | Alzheimer's disease Braak VI Hippocampal sclerosis  | moderate amyloid angiopathy mild vascular pathology old cystic infarct                                                  |
| X223H | hippocampus  | LOAD    | F   | 81  | 24    | ALZHEIMER'S DISEASE                                 | None                                                                                                                    |
| X22H  | hippocampus  | LOAD    | F   | 90  | 23    | Alzheimer's disease                                 | Infarction evidence of vasculitis                                                                                       |
| X23H  | hippocampus  | LOAD    | M   | 64  | 10    | ALZHEIMER'S DISEASE                                 | None                                                                                                                    |
| X24H  | hippocampus  | LOAD    | F   | 84  | 12    | Alzheimer's disease Braak 5-6                       | amyloid angiopathy                                                                                                      |
| X25H  | hippocampus  | LOAD    | M   | 68  | 18    | ALZHEIMER'S DISEASE: DEFINITE                       | None                                                                                                                    |
| X26H  | hippocampus  | LOAD    | M   | 89  | 18.5  | ALZHEIMER'S DISEASE: DEFINITE                       | AMYLOID ANGIOPATHY (SEVERE)                                                                                             |
| X27H  | hippocampus  | LOAD    | F   | 78  | 22    | ALZHEIMER'S DISEASE                                 | AMYLOID ANGIOPATHY                                                                                                      |
| X28H  | hippocampus  | LOAD    | F   | 79  | 8     | ALZHEIMER'S DISEASE: DEFINITE                       | None                                                                                                                    |
| X29H  | hippocampus  | LOAD    | F   | 66  | 21    | ALZHEIMER'S DISEASE                                 | None                                                                                                                    |
| X2H   | hippocampus  | LOAD    | F   | 83  | 20    | ALZHEIMER'S DISEASE                                 | None                                                                                                                    |
| X30H  | hippocampus  | LOAD    | M   | 74  | 24    | ALZHEIMER'S DISEASE                                 | None                                                                                                                    |
| X31H  | hippocampus  | LOAD    | M   | 81  | 24    | ALZHEIMER'S DISEASE                                 | None                                                                                                                    |
| X32H  | hippocampus  | LOAD    | M   | 84  | 21    | ALZHEIMER'S DISEASE                                 | CEREBRAL VASCULAR DISEASE (SMALL INFARCTS), ARACHNOID CYST                                                              |
| X33H  | hippocampus  | LOAD    | F   | 84  | 23    | ALZHEIMER'S DISEASE                                 | CEREBROVASCULAR DISEASE                                                                                                 |
| X34H  | hippocampus  | LOAD    | F   | 88  | 19    | Alzheimer's disease with amyloid angiopathy Braak V | mild Small Vessel disease                                                                                               |
| X35H  | hippocampus  | LOAD    | F   | 75  | 14    | ALZHEIMER'S DISEASE                                 | None                                                                                                                    |
| X36H  | hippocampus  | LOAD    | M   | 63  | 20    | ALZHEIMER'S DISEASE                                 | None                                                                                                                    |
| X37H  | hippocampus  | LOAD    | F   | 91  | 9     | Alzheimer's disease                                 | None                                                                                                                    |
| X39H  | hippocampus  | LOAD    | F   | ?   | 24    | ALZHEIMER'S DISEASE                                 | None                                                                                                                    |
| X3H   | hippocampus  | LOAD    | F   | 82  | 19    | ALZHEIMER'S DISEASE                                 | None                                                                                                                    |
| X40H  | hippocampus  | LOAD    | M   | 67  | 24    | ALZHEIMER'S DISEASE                                 | None                                                                                                                    |
| X41H  | hippocampus  | LOAD    | F   | 89  | 20    | Alzheimer's disease tangle predominant type Braak V | None                                                                                                                    |
| X4H   | hippocampus  | LOAD    | F   | 96  | 18    | Alzheimer's disease with amyloid angiopathy Braak V | Mild Small Vessel disease                                                                                               |
| X5H   | hippocampus  | LOAD    | F   | 84  | 16.6  | Alzheimer's disease Braak V severe                  | vascular changes                                                                                                        |
| X6H   | hippocampus  | LOAD    | M   | 85  | 17    | ALZHEIMER'S DISEASE                                 | None                                                                                                                    |
| X7H   | hippocampus  | LOAD    | M   | 78  | 20.5  | Alzheimer's disease Braak VI                        | amyloid angiopathy                                                                                                      |
| X8H   | hippocampus  | LOAD    | F   | 69  | 16.3  | Alzheimer's disease Braak VI                        | None                                                                                                                    |
| X9H   | hippocampus  | LOAD    | F   | 71  | 21    | Alzheimer's disease Braak VI                        | severe amyloid angiopathy                                                                                               |

Sex: F (Female), M (Male)  
PMI: *post-mortem* interval (in hours)

**Supplementary Table 2. Clinical data of sample cases in the cohort 2 (prefrontal cortex samples)**

| ID   | Group                           | Braak stage |    | Prefrontal pathology |                                                          | Age | Sex | APOE |
|------|---------------------------------|-------------|----|----------------------|----------------------------------------------------------|-----|-----|------|
|      |                                 | NFT         | PL | NFT                  | PL                                                       |     |     |      |
| BR01 | Non-demented control, Braak 0   | 0           | B  | None                 | Substantial number of diffuse plaques                    | 64  | F   | 42   |
| BR02 | Non-demented control, Braak 0   | 0           | A  | None                 | None                                                     | 80  | M   | 33   |
| BR03 | Non-demented control, Braak 0   | 0           | A  | None                 | Some senile plaques, few diffuse plaques                 | 72  | M   | 43   |
| BR04 | Non-demented control, Braak 0   | 0           | A  | None                 | None                                                     | 78  | M   | 33   |
| BR05 | Non-demented control, Braak 0   | 0           | A  | None                 | None                                                     | 52  | F   | 33   |
| BR06 | Non-demented control, Braak 0   | 0           | B  | None                 | Many diffuse plaques                                     | 74  | M   | 43   |
| BR07 | Non-demented control, Braak 0   | 0           | A  | ?                    | ?                                                        | 74  | F   | 33   |
| BR11 | Non-demented control, Braak 1   | I           | A  | None                 | None                                                     | 72  | F   | 43   |
| BR12 | Non-demented control, Braak 1   | I           | B  | None                 | Few senile plaques, many diffuse plaques                 | 83  | M   | 33   |
| BR13 | Non-demented control, Braak 1   | I           | A  | A single NFT         | Few diffuse plaques                                      | 78  | F   | 43   |
| BR14 | Non-demented control, Braak 1   | I           | A  | None                 | None                                                     | 78  | M   | 33   |
| BR15 | Non-demented control, Braak 1   | I           | A  | None                 | Few plaques, few classic                                 | 90  | F   | 32   |
| BR16 | Non-demented control, Braak 1   | I           | A  | None                 | Few-to-many plaques, partly classical                    | 79  | M   | 33   |
| BR17 | Non-demented control, Braak 1   | I           | A  | None                 | Substantial number of plaques, few classical             | 82  | F   | 32   |
| BR21 | Non-demented control, Braak 2   | II          | A  | None                 | None                                                     | 68  | M   | 33   |
| BR22 | Non-demented control, Braak 2   | II          | A  | None                 | None                                                     | 79  | M   | 33   |
| BR23 | Non-demented control, Braak 2   | II          | A  | None                 | None                                                     | 78  | F   | 43   |
| BR24 | Non-demented control, Braak 2   | II          | C  | None                 | None                                                     | 89  | F   | 32   |
| BR25 | Non-demented control, Braak 2   | II          | B  | None                 | Many plaques                                             | 69  | F   | 43   |
| BR26 | Non-demented control, Braak 2   | II          | B  | None                 | Few-to-substantial senile plaques                        | 71  | M   | 43   |
| BR27 | Non-demented control, Braak 2   | II          | O  | None                 | None                                                     | 83  | F   | 33   |
| BR31 | Non-demented control, Braak 3   | III         | B  | None                 | Many senile plaques                                      | 87  | M   | 33   |
| BR32 | Dementia with s.i.c.c., Braak 3 | III         | B  | None                 | Many plaques                                             | 74  | F   | 43   |
| BR33 | Non-demented control, Braak 3   | III         | B  | None                 | Many plaques                                             | 81  | M   | 33   |
| BR34 | Non-demented control, Braak3    | III         | B  | None                 | Substantial senile plaques                               | 93  | M   | 43   |
| BR35 | Non-demented control, Braak 3   | III         | B  | None                 | Many diffuse plaques, some classical. Few senile plaques | 84  | F   | 33   |
| BR36 | Non-demented control, Braak 3   | III         | A  | None                 | None                                                     | 91  | F   | 32   |
| BR37 | Dementia with s.i.c.c., Braak3  | III         | C  | Few NFTs             | Many plaques, substantial senile plaques                 | 85  | F   | 33   |
| BR41 | Alzheimer's disease, Braak 4    | IV          | C  | None                 | Many plaques, few senile plaques                         | 86  | F   | 43   |
| BR42 | Alzheimer's disease, Braak 4    | IV          | C  | None                 | Many largely diffuse plaques, several senile plaques     | 88  | F   | 33   |
| BR43 | Alzheimer's disease, Braak 4    | IV          | C  | Few NFTs             | Many plaques, few classic plaques, few senile plaques    | 86  | M   | 33   |
| BR44 | Alzheimer's disease, Braak 4    | IV          | C  | Few NFTs             | Many plaques, substantial senile plaques                 | 75  | F   | 33   |
| BR45 | Alzheimer's disease, Braak 4    | IV          | C  | None                 | Many plaques, many senile plaques                        | 79  | M   | 43   |
| BR46 | Alzheimer's disease, Braak 4    | IV          | C  | Variable NFTs        | Many diffuse plaques                                     | 78  | M   | 43   |
| BR47 | Alzheimer's disease, Braak 4    | IV          | B  | Few NFTs             | Many diffuse plaques, few senile plaques                 | 84  | F   | 32   |
| BR51 | Alzheimer's disease, Braak 5    | V           | C  | Many NFTs            | Many senile plaques                                      | 71  | F   | 43   |
| BR52 | Alzheimer's disease, Braak 5    | V           | C  | Many NFTs            | Many senile plaques                                      | 69  | F   | 42   |
| BR53 | Alzheimer's disease, Braak5     | V           | C  | Substantial NFTs     | Many plaques, part classical, few senile plaques         | 85  | M   | 43   |
| BR54 | Alzheimer's disease, Braak 5    | V           | C  | Many NFTs            | Many diffuse plaques, many senile plaques                | 67  | M   | 33   |
| BR55 | Alzheimer's disease, Braak 5    | V           | C  | Few NFTs             | Substantial plaques, few senile plaques                  | 78  | M   | 43   |
| BR56 | Alzheimer's disease, Braak 5    | V           | C  | Many NFTs            | Substantial senile plaques                               | 71  | F   | 33   |
| BR57 | Alzheimer's disease, Braak 5    | V           | C  | Many NFTs            | Many plaques, some senile plaques                        | 79  | M   | 33   |
| BR61 | Alzheimer's disease, Braak 6    | VI          | C  | Substantial NFTs     | Many plaques, many senile plaques                        | 80  | M   | 43   |
| BR62 | Alzheimer's disease, Braak 6    | VI          | C  | Many NFTs            | Many plaques, many senile plaques                        | 80  | F   | 44   |
| BR63 | Alzheimer's disease, Braak 6    | VI          | C  | Substantial NFTs     | Many plaques, few senile plaques                         | 67  | M   | 43   |
| BR64 | Alzheimer's disease, Braak 6    | VI          | C  | Many NFTs            | Many plaques, many senile plaques                        | 67  | F   | 33   |
| BR65 | Alzheimer's disease, Braak 6    | VI          | C  | Many NFTs            | Many plaques, many senile plaques                        | 68  | F   | 32   |
| BR66 | Alzheimer's disease, Braak 6    | VI          | C  | Many NFTs            | Many senile plaques                                      | 58  | M   | 33   |
| BR67 | Alzheimer's disease, Braak 6    | VI          | C  | Many NFTs            | Many plaques, many senile plaques                        | 72  | F   | 43   |

NFT: presence of neurofibrillary tangles disseminated in major cortical brain areas according to Braak stages (O to VI) and in prefrontal cortex

PL: presence of amyloid plaque loads in major cortical brain areas and in prefrontal cortex (From A to C)

Sex: F (Female), M (Male)

APOE: APOE genotype

**Supplementary Table 3. Clinical diagnosis of sample cases in the cohort 3 (temporal gyrus samples)**

| Class                | ID    | Sex | Age | Braak | PMI   | APOE | Brain region              |
|----------------------|-------|-----|-----|-------|-------|------|---------------------------|
| Alzheimer's disease  | NBB1  | M   | 77  | VI    | 06:35 | NA   | superior temporalis gyrus |
| Alzheimer's disease  | NBB2  | M   | 80  | VI    | 04:20 | 43   | inferior temporalis gyrus |
| Alzheimer's disease  | NBB4  | M   | 82  | V     | 04:15 | 43   | medial temporalis gyrus   |
| Alzheimer's disease  | NBB5  | M   | 83  | VI    | 06:10 | NA   | superior temporalis gyrus |
| Alzheimer's disease  | NBB7  | M   | 85  | V     | 07:10 | 33   | medial temporalis gyrus   |
| Alzheimer's disease  | NBB8  | M   | 85  | V     | 04:25 | 43   | superior temporalis gyrus |
| Alzheimer's disease  | NBB9  | M   | 85  | V     | 04:45 | 43   | superior temporalis gyrus |
| Alzheimer's disease  | NBB10 | M   | 86  | V     | 06:15 | NA   | superior temporalis gyrus |
| Non-demented control | NBB14 | M   | 71  | I     | 07:40 | 33   | superior temporalis gyrus |
| Non-demented control | NBB15 | M   | 77  | I     | 08:25 | 32   | superior temporalis gyrus |
| Non-demented control | NBB16 | M   | 78  | I     | 05:35 | 43   | inferior temporalis gyrus |
| Non-demented control | NBB17 | M   | 80  | 0     | 07:15 | 33   | superior temporalis gyrus |
| Non-demented control | NBB19 | M   | 82  | I     | 05:10 | NA   | superior temporalis gyrus |
| Non-demented control | NBB20 | M   | 84  | I     | 07:05 | 33   | superior temporalis gyrus |
| Non-demented control | NBB21 | M   | 88  | I     | 07:00 | 32   | superior temporalis gyrus |
| Non-demented control | NBB22 | M   | 96  | I     | 06:30 | 33   | superior temporalis gyrus |

M (Male)

PMI: *post-mortem* interval (in hours)

APOE: APOE genotype

NA: Not available



**Supplementary Table 4. MiRNAs called different by deep-sequencing and without corresponding probes in the nCounter system**

| miRNA             | Control | LOAD  | Fold Change | log2 Fold Change | pval     | padj     |
|-------------------|---------|-------|-------------|------------------|----------|----------|
| hsa-miR-132-5p    | 1315    | 339   | 0.26        | -1.95            | 6.97E-13 | 1.95E-10 |
| hsa-miR-3607-3p   | 3946    | 576   | 0.15        | -2.78            | 1.08E-12 | 2.27E-10 |
| hsa-miR-7-1-3p    | 166     | 432   | 2.60        | 1.38             | 6.46E-10 | 5.42E-08 |
| hsa-miR-5701      | 217     | 46    | 0.21        | -2.25            | 8.31E-10 | 6.34E-08 |
| hsa-miR-338-3p    | 28741   | 65927 | 2.29        | 1.20             | 9.47E-10 | 6.62E-08 |
| hsa-miR-26b-3p    | 435     | 174   | 0.40        | -1.33            | 2.40E-09 | 1.55E-07 |
| hsa-miR-3653      | 226     | 51    | 0.23        | -2.14            | 8.27E-09 | 4.62E-07 |
| hsa-miR-212-5p    | 197     | 51    | 0.26        | -1.94            | 9.04E-09 | 4.74E-07 |
| hsa-miR-6087      | 9       | 2     | 0.16        | -2.61            | 2.69E-07 | 7.05E-06 |
| hsa-miR-376a-5p   | 3336    | 1156  | 0.35        | -1.53            | 5.02E-07 | 1.24E-05 |
| hsa-miR-1225-5p   | 42      | 12    | 0.28        | -1.83            | 5.25E-06 | 9.18E-05 |
| hsa-miR-873-3p    | 531     | 244   | 0.46        | -1.12            | 5.49E-06 | 9.40E-05 |
| hsa-miR-6511b-3p  | 296     | 146   | 0.49        | -1.02            | 7.77E-06 | 0.0001   |
| hsa-miR-6511a-3p  | 262     | 130   | 0.49        | -1.01            | 1.02E-05 | 0.0002   |
| hsa-miR-365b-3p   | 195     | 380   | 1.95        | 0.97             | 1.30E-05 | 0.0002   |
| hsa-miR-3613-5p   | 143     | 278   | 1.95        | 0.96             | 2.42E-05 | 0.0003   |
| hsa-miR-6721-5p   | 8       | 2     | 0.24        | -2.03            | 3.12E-05 | 0.0004   |
| hsa-miR-4520a-3p  | 15      | 4     | 0.29        | -1.80            | 3.53E-05 | 0.0004   |
| hsa-miR-1185-1-3p | 80      | 32    | 0.40        | -1.31            | 4.93E-05 | 0.0005   |
| hsa-miR-139-3p    | 397     | 216   | 0.54        | -0.88            | 6.15E-05 | 0.0006   |
| hsa-miR-3613-3p   | 18      | 44    | 2.44        | 1.28             | 7.18E-05 | 0.0007   |
| hsa-miR-191-3p    | 142     | 73    | 0.51        | -0.97            | 8.58E-05 | 0.0008   |

Numbers in the Control and LOAD columns represent normalized reads

**Supplementary Table 5. Percentage of neurons positive for miR-132-3p in the prefrontal cortex**

| ID    | Braak | Absolute counts |               |       | Percentage    |               |
|-------|-------|-----------------|---------------|-------|---------------|---------------|
|       |       | miR-132-3p(+)   | miR-132-3p(-) | Total | miR-132-3p(+) | miR-132-3p(-) |
| BR0.3 | 0     | 162             | 12            | 174   | 93.1          | 6.9           |
| BR1.5 | I     | 134             | 10            | 144   | 93.1          | 6.9           |
| BR1.7 | I     | 143             | 8             | 151   | 94.7          | 5.3           |
| BR2.2 | II    | 91              | 7             | 98    | 92.9          | 7.1           |
| BR3.2 | III   | 180             | 9             | 189   | 95.2          | 4.8           |
| BR4.3 | IV    | 125             | 2             | 127   | 98.4          | 1.6           |
| BR5.2 | V     | 163             | 12            | 175   | 93.1          | 6.9           |
| BR6.5 | VI    | 206             | 13            | 219   | 94.1          | 5.9           |

**Supplementary Table 6. miR-132-3p predictions for Tau related targets and FOX targets by different algorithms**

| miRNA              | Target Gene  | TargetScan v6.2 | DIANAmT  | microna.org | miRanda  | miRDB    | miRWalk  | RNAhybrid | PICTAR4  | PICTAR5  | PITA     | RNA22    | sum       |
|--------------------|--------------|-----------------|----------|-------------|----------|----------|----------|-----------|----------|----------|----------|----------|-----------|
| hsa-miR-132        | EP300        | 1               | 1        | 1           | 1        | 1        | 1        | 1         | 1        | 1        | 1        | 0        | 10        |
| hsa-miR-132        | SIRT1        | 1               | 1        | 0           | 1        | 1        | 1        | 1         | 0        | 1        | 1        | 1        | 9         |
| hsa-miR-132        | MAPT         | 1               | 1        | 1           | 1        | 0        | 1        | 0         | 0        | 0        | 0        | 0        | 5         |
| hsa-miR-132        | GSK3B        | 1               | 0        | 0           | 1        | 0        | 1        | 0         | 0        | 0        | 0        | 0        | 3         |
| hsa-miR-132        | FOXN3        | 1               | 1        | 1           | 1        | 0        | 1        | 1         | 1        | 1        | 1        | 1        | 10        |
| <b>hsa-miR-132</b> | <b>FOXO3</b> | <b>1</b>        | <b>1</b> | <b>1</b>    | <b>1</b> | <b>1</b> | <b>1</b> | <b>1</b>  | <b>1</b> | <b>1</b> | <b>1</b> | <b>0</b> | <b>10</b> |
| hsa-miR-132        | FOXA1        | 1               | 1        | 1           | 1        | 1        | 1        | 1         | 0        | 1        | 1        | 0        | 9         |
| hsa-miR-132        | FOXP2        | 1               | 1        | 1           | 1        | 1        | 1        | 0         | 0        | 1        | 1        | 0        | 8         |
| hsa-miR-132        | FOXP1        | 1               | 1        | 1           | 1        | 0        | 1        | 0         | 0        | 1        | 0        | 0        | 6         |
| hsa-miR-132        | FOXN4        | 0               | 1        | 0           | 1        | 0        | 1        | 0         | 0        | 1        | 0        | 1        | 6         |
| hsa-miR-132        | FOXM1        | 0               | 1        | 0           | 1        | 0        | 1        | 0         | 0        | 1        | 1        | 0        | 6         |
| <b>hsa-miR-132</b> | <b>FOXO1</b> | <b>1</b>        | <b>1</b> | <b>0</b>    | <b>1</b> | <b>0</b> | <b>1</b> | <b>0</b>  | <b>0</b> | <b>1</b> | <b>0</b> | <b>0</b> | <b>5</b>  |
| hsa-miR-132        | FOXE1        | 0               | 1        | 0           | 1        | 0        | 1        | 0         | 0        | 1        | 0        | 0        | 5         |
| hsa-miR-132        | FOXF2        | 0               | 1        | 0           | 1        | 0        | 1        | 0         | 0        | 1        | 0        | 0        | 5         |
| hsa-miR-132        | FOXG1        | 0               | 0        | 1           | 1        | 0        | 0        | 0         | 0        | 1        | 1        | 0        | 4         |
| hsa-miR-132        | FOXN2        | 0               | 0        | 1           | 1        | 0        | 0        | 0         | 0        | 1        | 1        | 0        | 4         |
| hsa-miR-132        | FOXJ3        | 0               | 0        | 0           | 1        | 0        | 0        | 0         | 0        | 1        | 1        | 0        | 4         |
| hsa-miR-132        | FOXK1        | 0               | 0        | 0           | 1        | 0        | 0        | 0         | 0        | 1        | 1        | 0        | 3         |
| hsa-miR-132        | FOXQ1        | 0               | 0        | 0           | 1        | 0        | 0        | 0         | 0        | 1        | 1        | 0        | 3         |
| hsa-miR-132        | FOXC1        | 0               | 0        | 0           | 1        | 0        | 0        | 0         | 0        | 1        | 0        | 0        | 2         |
| hsa-miR-132        | FOXJ2        | 0               | 0        | 0           | 1        | 0        | 0        | 0         | 0        | 1        | 0        | 0        | 2         |
| hsa-miR-132        | FOXK2        | 0               | 0        | 0           | 1        | 0        | 0        | 0         | 0        | 1        | 0        | 0        | 2         |
| hsa-miR-132        | FOXP4        | 0               | 0        | 0           | 1        | 0        | 0        | 0         | 0        | 1        | 0        | 0        | 2         |
| <b>hsa-miR-132</b> | <b>FOXO4</b> | <b>0</b>        | <b>0</b> | <b>0</b>    | <b>0</b> | <b>0</b> | <b>0</b> | <b>0</b>  | <b>0</b> | <b>1</b> | <b>0</b> | <b>0</b> | <b>1</b>  |
| hsa-miR-132        | FOXC2        | 0               | 0        | 0           | 0        | 0        | 0        | 0         | 0        | 0        | 1        | 0        | 1         |
| hsa-miR-132        | FOXD2        | 0               | 0        | 0           | 0        | 0        | 0        | 0         | 0        | 0        | 1        | 0        | 1         |

Eleven target prediction software were used to obtain miR-132-3p predictions for the four Tau related targets (EP300, SIRT1, MAPT and GSK3B)

The other miR-132-3p predictions are for the FOX transcripts and the FOXO subfamily is shown in bold

The sum corresponds to the number of different algorithms predicting a particular miR-132-3p target

**Supplementary Table 7. Enrichment of transcription factor binding sites in the promoter of genes down-regulated between BRI and BRVI**

| Rank | Motif id            | Z-score | Transcription factor                                   | Target genes |
|------|---------------------|---------|--------------------------------------------------------|--------------|
| 1    | elemento-TTTATGGC   | 3.61    | NA                                                     | 31           |
| 2    | transfac_pro-M01862 | 3.56    | ATF2,CREB1,CREM,ATF3,ATF4,ATF1,ATF7,ATF5,ATF6,JDP2     | 54           |
| 3    | hdpi-CREB1          | 3.44    | CREB1                                                  | 47           |
| 4    | transfac_pro-M00338 | 3.44    | ATF3,ATF5,ATF1,CREB1,ATF7,CREM,ATF6,ATF2,ATF4,JUN,JDP2 | 98           |
| 5    | transfac_pro-M00039 | 3.41    | CREB1,CREM,ATF2,ATF6,ATF7,ATF1,ATF3,ATF4,ATF5,JDP2     | 112          |
| 6    | transfac_pro-M00916 | 3.40    | CREB1,CREM,ATF6,ATF1,ATF2,ATF7,ATF4,ATF5,ATF3,JDP2     | 148          |
| 7    | yetfasco-299        | 3.34    | ATF2,CREB1                                             | 80           |
| 8    | yetfasco-44         | 3.30    | ATF2,CREB1,CREM                                        | 83           |
| 9    | yetfasco-8          | 3.30    | ATF2,CREB1,CREM                                        | 83           |
| 10   | transfac_pro-M00178 | 3.28    | CREB1,CREM,ATF2,ATF4,ATF3,ATF5,ATF1,ATF7,ATF6,JDP2     | 91           |
| 11   | transfac_pro-M00017 | 3.28    | CREB1,CREM,ATF3,ATF2,ATF6,ATF4,ATF1,ATF7,ATF5,JDP2     | 149          |
| 12   | jaspar-PF0014.1     | 3.23    | ATF3,ATF1,CREB1,JDP2                                   | 28           |
| 13   | elemento-TGACGTCA   | 3.23    | ATF3,ATF1,CREB1,JDP2                                   | 95           |
| 14   | stark-AATTRNNNNNCAA | 3.22    | NA                                                     | 29           |
| 15   | transfac_pro-M00179 | 3.22    | ATF2,CREB1,CREM,ATF4,ATF3,ATF7,ATF6,ATF5,ATF1,E4F1     | 28           |
| 16   | transfac_pro-M00177 | 3.20    | CREB1,CREM,ATF4,ATF2,ATF3,ATF1,ATF6,ATF5,ATF7          | 136          |
| 17   | transfac_pro-M01863 | 3.18    | ATF3,ATF4,ATF2,CREB1,CREM,ATF7,ATF6,ATF1,ATF5          | 22           |
| 18   | jaspar-PF0099.1     | 3.15    | NA                                                     | 33           |
| 19   | yetfasco-1489       | 3.10    | CREB1,CREM,ATF6,ATF5,ATF3,ATF7,ATF4,ATF2,ATF1          | 63           |
| 20   | transfac_pro-M00406 | 3.04    | MEF2A                                                  | 43           |
| 21   | jaspar-CN0010.1     | 3.04    | RFX1,RFX2,RFX4,RFX6,RFX8                               | 29           |
| 22   | transfac_pro-M00691 | 3.04    | ATF1,ATF3                                              | 81           |
| 23   | transfac_pro-M00917 | 3.04    | CREM,CREB1,ATF2,ATF6,ATF4,ATF1,ATF3,ATF5,ATF7,JDP2     | 148          |
| 24   | stark-AATTRYGWCA    | 3.03    | NA                                                     | 16           |
| 25   | transfac_pro-M01861 | 3.03    | ATF1,ATF2,CREB1,ATF6,ATF7,ATF4,ATF5,CREM,ATF3          | 84           |
| 26   | jaspar-PF0009.1     | 3.02    | ATF3,JDP2                                              | 31           |
| 27   | yetfasco-727        | 3.01    | NA                                                     | 33           |

There were 673 genes down-regulated between BRI and BRVI stages

NA: Motif not annotated

**Supplementary Table 8. Detection of FOX motifs by HOMER (known motif approach) in the different gene sets**

| Homer parameters | Gene set              | FOX rank | P-value  | log P-pvalue | % of Targets | % of Background | Best Match/Details                                |
|------------------|-----------------------|----------|----------|--------------|--------------|-----------------|---------------------------------------------------|
| Homer_20kb       | Down                  | ND       | ND       | ND           | ND           | ND              | ND                                                |
| Homer_20kb       | Up                    | 2        | 1.00E-04 | -1.12E+01    | 27.58%       | 21.41%          | NF1:FOXA1/LNCAP-FOXA1-ChIP-Seq/Homer              |
| Homer_20kb       | Up                    | 16       | 1.00E-02 | -5.58E+00    | 100.00%      | 99.35%          | Foxo1(Forkhead)/RAW-Foxo1-ChIP-Seq/Homer          |
| Homer_20kb       | TargetScan_miR-132-3p | 6        | 1.00E-02 | -4.98E+00    | 95.45%       | 86.81%          | FOXP1(Forkhead)/H9-FOXP1-ChIP-Seq(GSE31006)/Homer |
| Homer_20kb       | TargetScan_miR-132-3p | 9        | 1.00E-02 | -4.80E+00    | 44.32%       | 31.57%          | FOXA1:AR/LNCAP-AR-ChIP-Seq/Homer                  |

Down: Down-regulated in BRVI compared to BRI stage

Up: Up-regulated in BRVI compared to BRI stage

TargetScan\_miR-132-3p: miRNA targets as predicted by TargetScan algorithm

The FOX rank indicates the rank of the motif predicted to be bound by the FOX TFs

ND: FOX motif not detected

**Supplementary Table 9. List of PCR primers used for 3'UTR cloning**

| Name                    | Sequence (5' to 3')                                      |
|-------------------------|----------------------------------------------------------|
| TJAP1-XhoI              | TGATCTCGAGGCCCTGCTGGCCTTCCTGCCATTG                       |
| TJAP1-AscI              | TGATGGCGCGCCATAACCAGTAAAATAGTTTTATTTG                    |
| TJAP1-del-Reverse1      | CTCAAAGCTTAAGAGTAGAGCCAAGGTTGGGAGT                       |
| TJAP1-del-Reverse2      | AGTTTTATTTGATTTTAAAATAGTCATCAATGTGAAAATTTCTCAAAGCTTAAGAG |
| TJAP1-del-Reverse3      | TGATGGCGCGCCATAACCAGTAAAATAGTTTTATTTG                    |
| SIRT1-XhoI              | TGATCTCGAGTGTAATAATTGTGCAGGTACAGG                        |
| SIRT1-AscI              | TGATGGCGCGCCAAGTTAACAGAAAAAAGTCAAATGAC                   |
| SIRT1-del-SbfI          | TGATCCTGCAGGTACAAAACATATGCCAGT                           |
| EP300-XhoI              | TGATCTCGAGAGACACCTTGTAGTATTTTGGGAGC                      |
| EP300-AscI              | TGATGGCGCGCCTGTCTGTCTCACACAGTTTATTTAAC                   |
| EP300-del-SbfI          | TGATCCTGCAGGTATACAGTGATCCAAAGTTC                         |
| MAPT-XhoI               | TGATCTCGAGTCAGGCCCTGGGGCGGTCAATAAATTG                    |
| MAPT-AscI               | TGATGGCGCGCCAATCAGAGTAATAACTTTATTTT                      |
| MAPT-del-AscI           | TGATGGCGCGCCAGTGTAATCATTGTGTTAAACAC                      |
| FOXO1-XhoI              | TGATCTCGAGTGGGGCAGCATTCATAATTTTCA                        |
| FOXO1-AscI              | TGATGGCGCGCCTTGTGGCTGACAAGACTTAACTC                      |
| FOXO1-del1-Forward      | GAGGCAACTACAGCCAAAATCAAATCTTACTACTTCATGGAG               |
| FOXO1-del1-Reverse      | CTCCATGAAGTAGTAAGATTTGATTTGGCTGTAGTTGCCTC                |
| FOXO1-del2-Forward-SbfI | TGATCCTGCAGGTCCGTAATATAGACGTATGGAA                       |
| FOXO1-del2-Reverse-SbfI | TGATCCTGCAGGACAAACCAGAGAAAATAAATCAA                      |
